# Supplementary material for: Equity-Based Emissions Allocations in Multi-Level Governance
Source: Research Square preprint supplement (doi:10.21203/rs.3.rs-5989247/v1), 2025-03-12
Supplement: Supplementary file 1 [file f0a1b51fd8ce935e90b0181e.pdf]

## Supplementary Information for article: Equity-Based Emissions Allocations in Multi-Level Governance

**Authors:** Yann Robiou du Pont<sup>1,2\*</sup>, Diego Manya<sup>2</sup>, Kaihui Song<sup>4</sup>, Angel Hsu<sup>2,3</sup>

### Affiliations:

<sup>1</sup>Copernicus Institute of Sustainable Development, Utrecht University; Utrecht, The Netherlands

<sup>2</sup>Data-Driven EnviroLab, University of North Carolina at Chapel Hill; Chapel Hill, USA

<sup>3</sup>Department of Public Policy, University of North Carolina at Chapel Hill, Chapel Hill, NC 27516, USA

<sup>4</sup>Energy and Resources Group, University of California, Berkeley, Berkeley, CA 94270, USA

\*Corresponding author. Email: [yann.rdp@climate-energy-college.org](mailto:yann.rdp@climate-energy-college.org)

### Global level

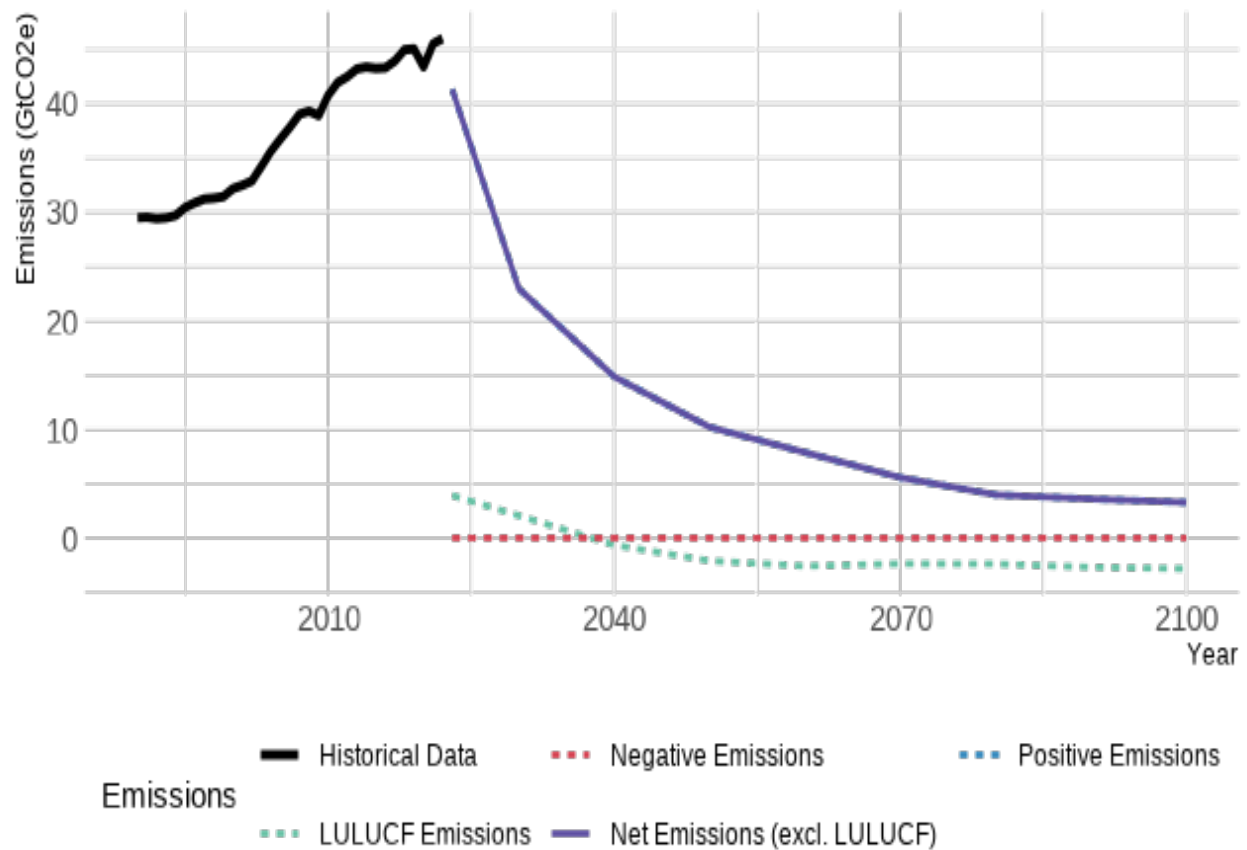

**Figure S1 | Global scenario (IMP-LD - MESSAGEix-GLOBIOM 1.0 - LowEnergyDemand\_1.3\_IPCC) decomposition between positive and negative emissions, excluding LULUCF, before allocation.**

Regional level

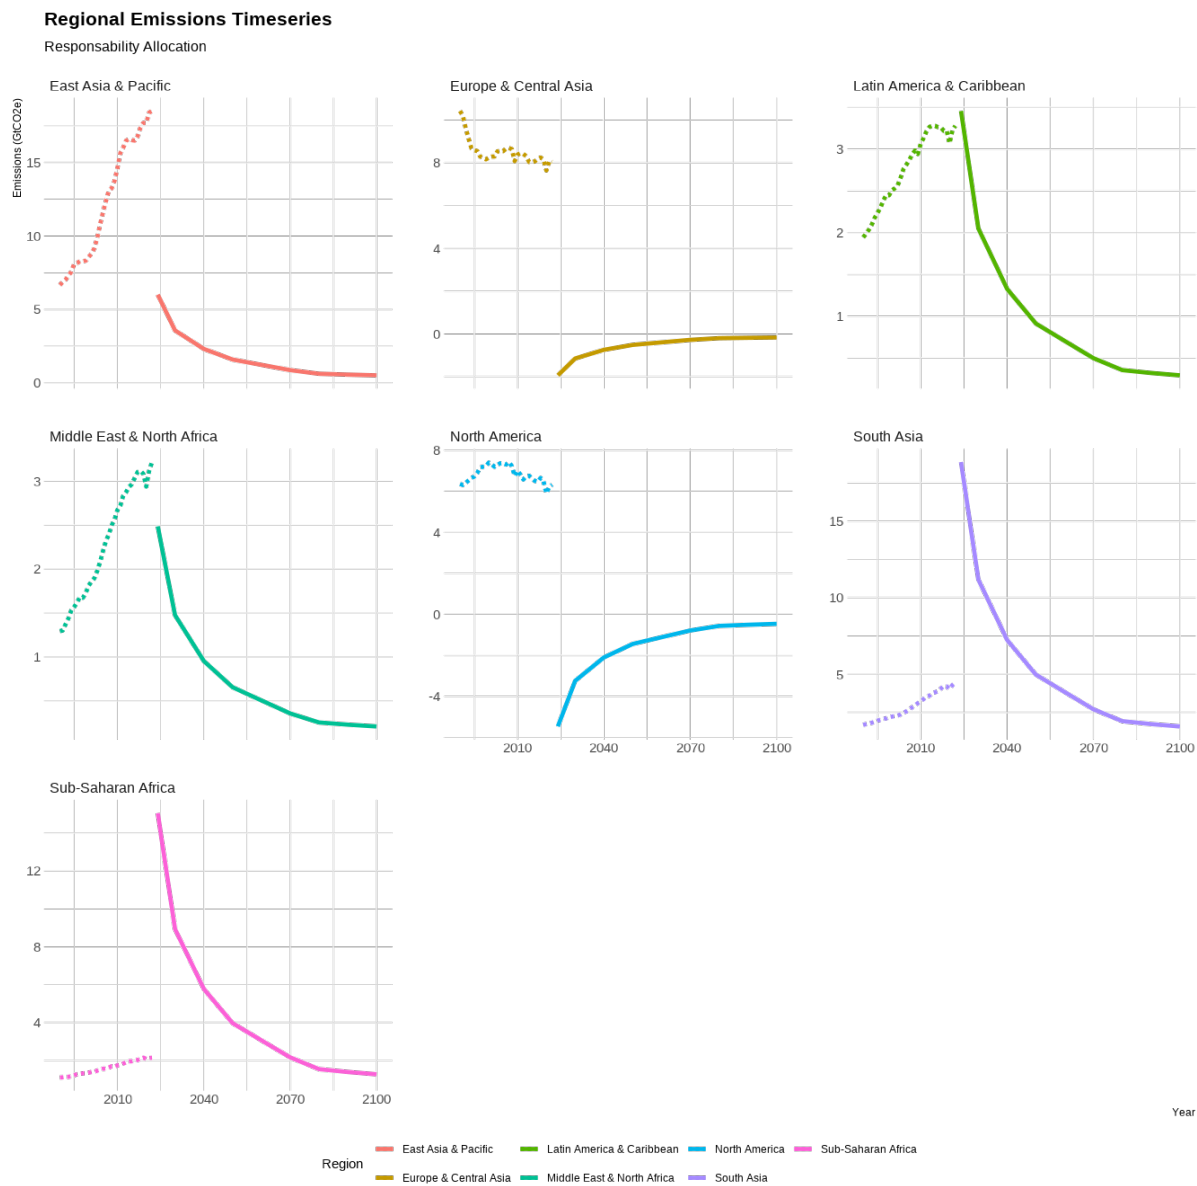

Figure S2 | Regional emissions timeseries as the aggregation of subnational responsibility allocations.

## Regional Emissions Timeseries

Capacity Allocation

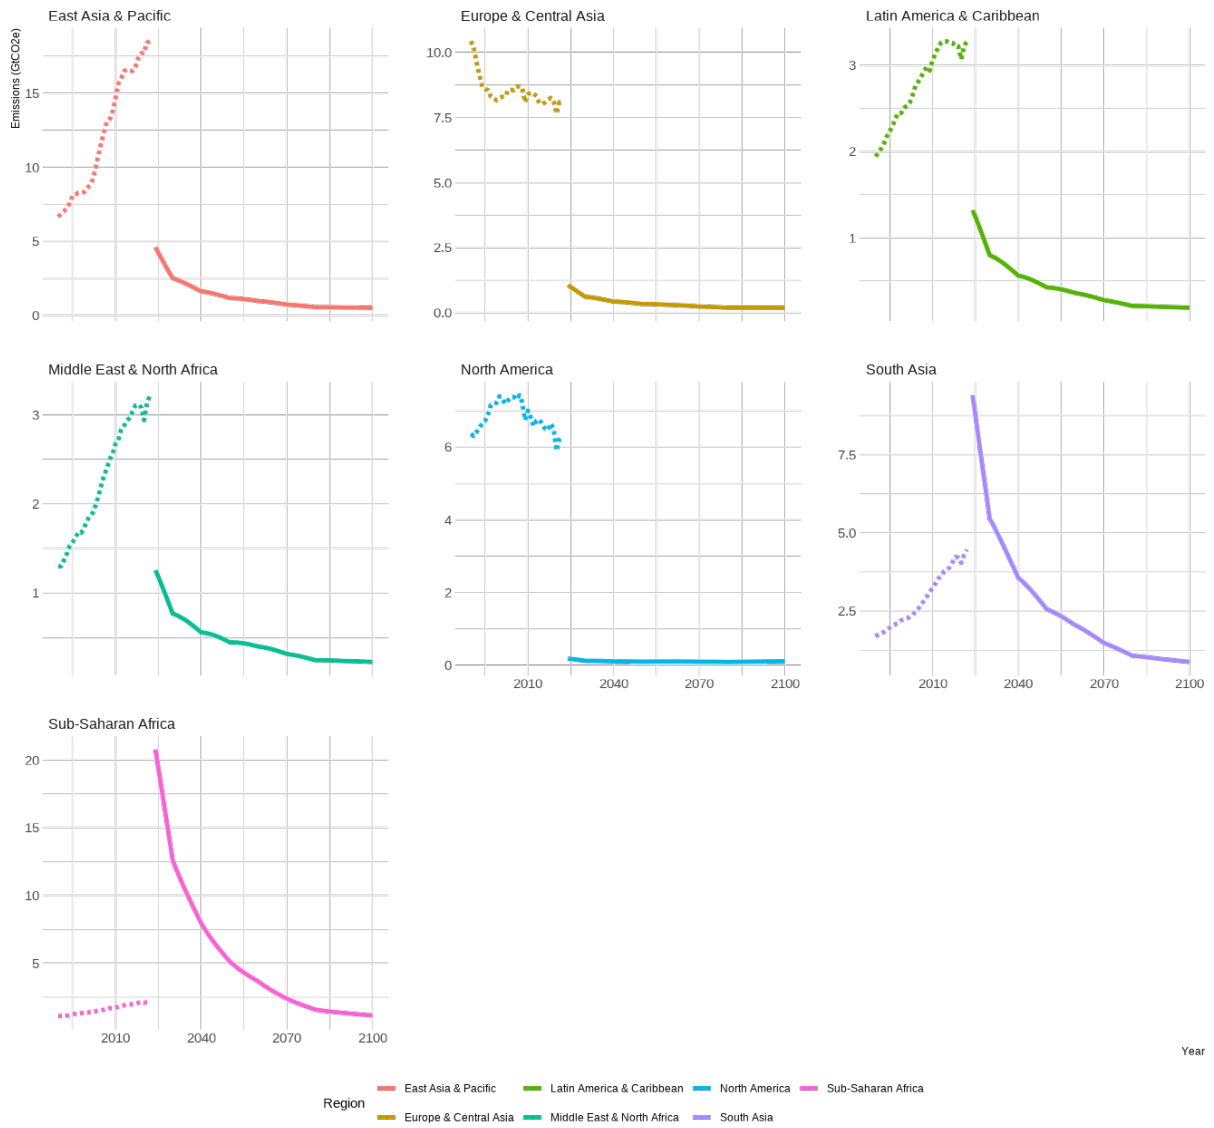

**Figure S3 | Regional emissions timeseries as the aggregation of subnational capability allocations.**

**Table S1: Summary of data availability by types of entities.**

| Entity Type | # with emissions allocations | # with emissions target |
|-------------|------------------------------|-------------------------|
| Region      | 3318                         | 160                     |
| City        | 160                          | 70                      |

**Table S2: Summary of warming alignment of various entities' emissions targets.**

| Entity type | Alignment | Count | Percent of entities |
|-------------|-----------|-------|---------------------|
| Country     | 1.5 °C    | 73    | 39.9%               |
|             | 2.0 °C    | 20    | 10.9%               |
|             | > 2.0 °C  | 90    | 49.2%               |
| Region      | 1.5 °C    | 32    | 20.0%               |
|             | 2.0 °C    | 14    | 8.7%                |
|             | > 2.0 °C  | 114   | 71.3%               |
| City        | 1.5 °C    | 34    | 48.6%               |
|             | 2.0 °C    | 6     | 8.6%                |
|             | > 2.0 °C  | 30    | 42.8%               |

**Table S3: Comparison of ambition, based on warming alignments, between subnational governments and their respective national governments.**

| Entity | Ambition compared to national level | Count | Percent of entities |
|--------|-------------------------------------|-------|---------------------|
| City   | As Ambitious                        | 32    | 45.7%               |
| City   | More Ambitious                      | 38    | 54.3%               |
| Region | As Ambitious                        | 119   | 74.4%               |
| Region | More Ambitious                      | 41    | 25.6%               |
